# Supplementary material
Source: MDPI journal article supplement (https://www.mdpi.com/1999-4907/12/9/1257)
Supplement: s1 [file s1 › forests-1347146-supplementary.pdf]

## Supplementary material

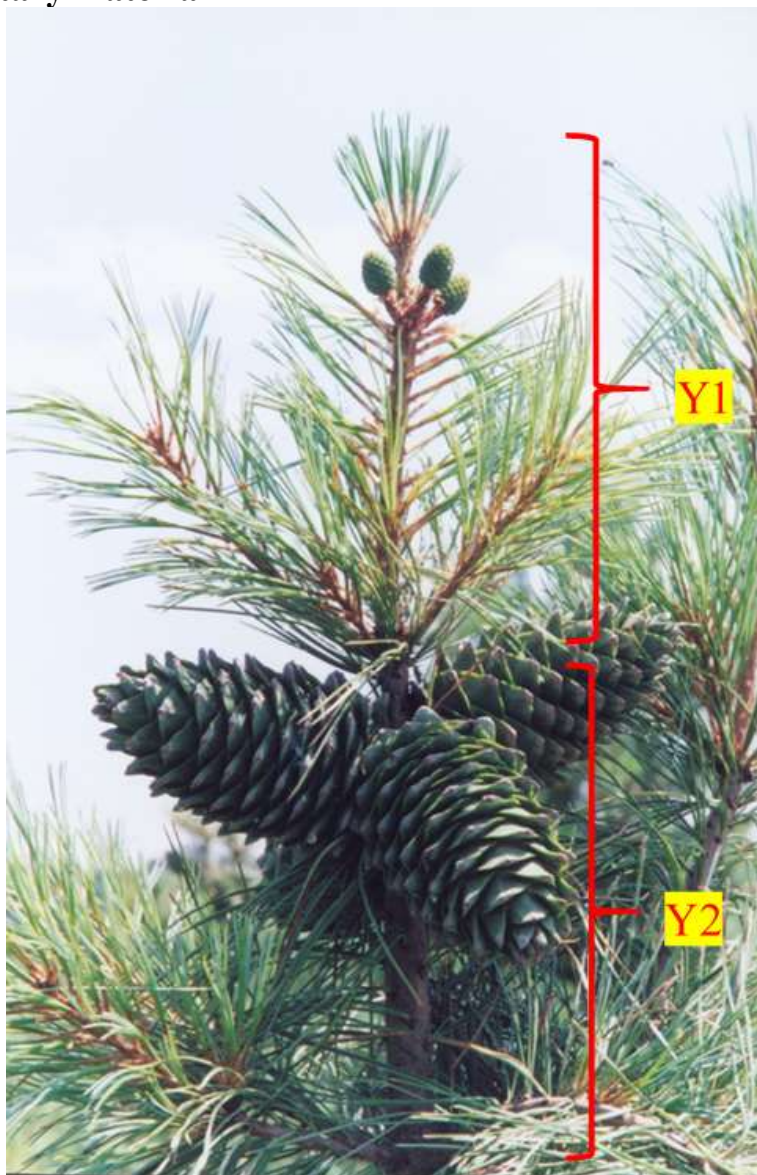

Figure S1. One-year-old (Y1) and two-years-old (Y2) shoots of reproductive branches of *Pinus koraiensis* trees monitored for “Experiment 1”.

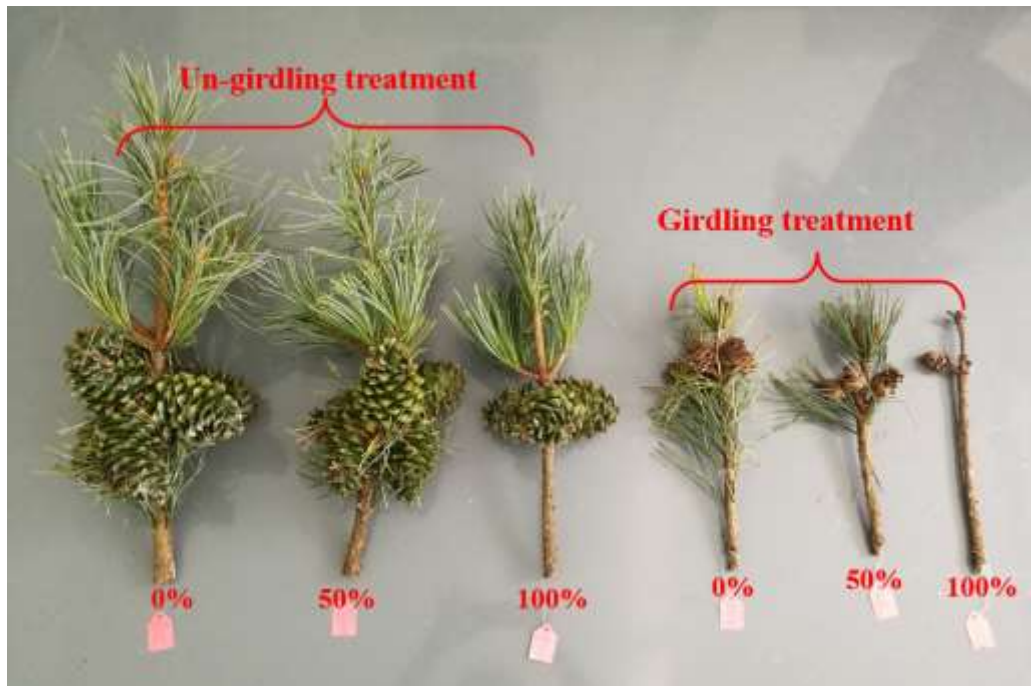

Figure S2. Visual example of twig growth and cone development in girdled and defoliated branches at harvesting of one *Pinus koraiensis* tree manipulated for “Experiment 1”. Regardless of the defoliation intensity, branch and cone growth and survival rates were higher in ungirdled branches.

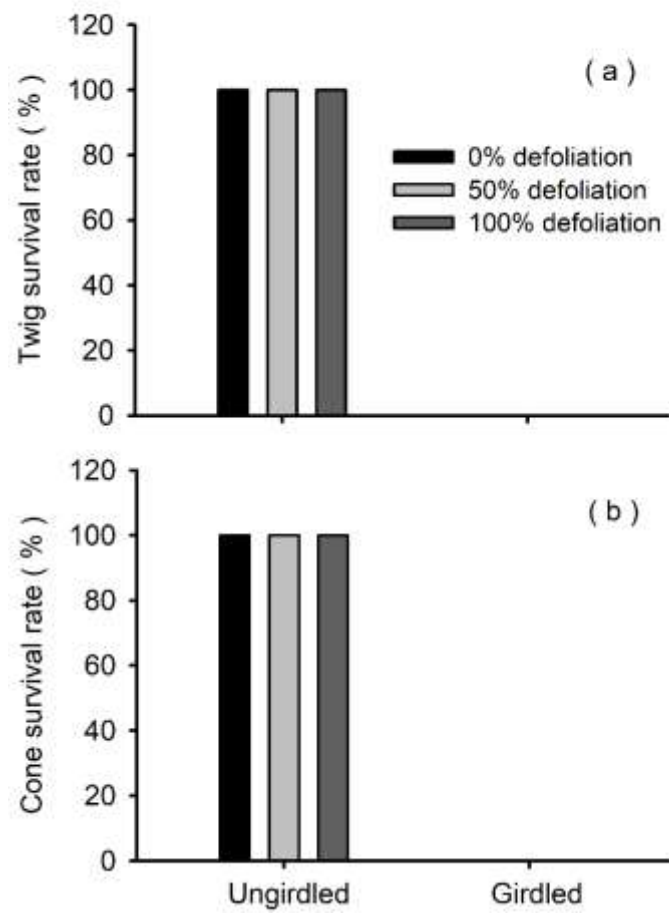

Figure S3. Twig and cone survival rate in *Pinus koraiensis* branches in response to girdling and defoliation treatments for “Experiment 1”. Twig and cone survival rate values were nil in girdled branches.

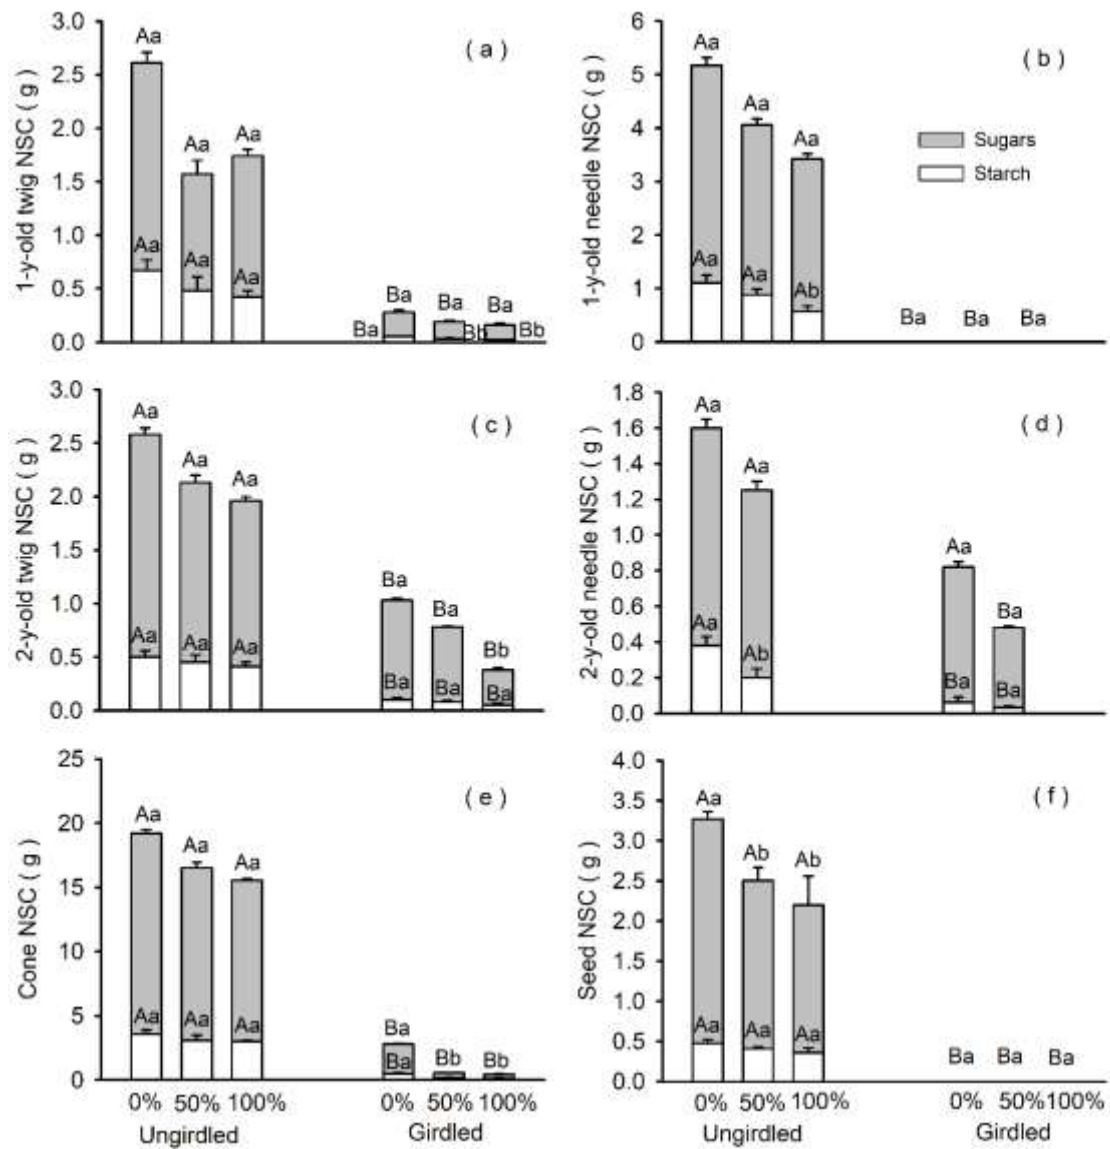

Figure S4. Non-structural carbohydrate content (NSC) of one-year-old (Y1; a, b and e) and two-year-old (Y2; c, d, and f) *Pinus koraiensis* branches in response to girdling and defoliation treatments for “Experiment 1”. One-year-old needle and seed NSC were nil in girdled branches. Bars and arrows represent the mean and corresponding standard error, respectively, per treatment combination. Different capital letters indicate a significant effect of girdling for a given defoliation intensity ( $P < 0.05$ ). Different lowercase letters indicate significant differences among defoliation intensities for a given girdling group ( $P < 0.05$ ). Means were compared using LSD tests.

Table S1. Effect of girdling (girdled and ungirdled) and defoliation (0 %, 50 % and 100 % intensity) and their interaction on branch growth and NSC concentrations in *Pinus koraiensis* trees (Experiment 1).

|       | 1-year-old |        |        |        | 2-year-old |        |        |        |        |        |        | 1-year-old     |                |                |                | 2-year-old     |                |                |                | Cone   |        | Seed   |        |
|-------|------------|--------|--------|--------|------------|--------|--------|--------|--------|--------|--------|----------------|----------------|----------------|----------------|----------------|----------------|----------------|----------------|--------|--------|--------|--------|
|       | NB         | BB     | BL     | BD     | NB         | BB     | BL     | BD     | CN     | CB     | SB     | Branch<br>[SS] | Branch<br>[ST] | Needle<br>[SS] | Needle<br>[ST] | Branch<br>[SS] | Branch<br>[ST] | Needle<br>[SS] | Needle<br>[ST] | [SS]   | [ST]   | [SS]   | [ST]   |
| G     | < 0.01     | < 0.01 | < 0.01 | < 0.01 | < 0.01     | < 0.01 | < 0.01 | < 0.01 | < 0.01 | < 0.01 | < 0.01 | < 0.01         | < 0.01         | < 0.01         | < 0.01         | < 0.01         | < 0.01         | < 0.01         | < 0.01         | < 0.01 | < 0.01 | < 0.01 | < 0.01 |
| D     | 0.067      | 0.082  | 0.342  | 0.104  | 0.056      | 0.358  | 0.365  | 0.120  | 0.532  | 0.051  | 0.071  | < 0.01         | 0.100          | < 0.01         | 0.011          | < 0.01         | 0.277          | < 0.01         | < 0.01         | < 0.01 | 0.150  | 0.157  | 0.545  |
| G × D | 0.068      | 0.200  | 0.531  | 0.188  | 0.495      | 0.859  | 0.951  | 0.434  | 0.532  | 0.150  | 0.071  | 0.022          | 0.509          | < 0.01         | 0.011          | < 0.01         | 0.417          | 0.108          | < 0.01         | < 0.01 | < 0.01 | 0.157  | 0.545  |

Linear mixed models were adjusted, with tree being considered as a random factor. *P*-values are shown. Significant ( $P < 0.05$ ) results are in bold. Abbreviations: NB: Needle biomass; BB: Branch biomass; BL: Branch length; BD: Branch diameter; CN: number of mature cones; CB: Cone biomass; SB: Seed biomass; [SS]: Concentration of soluble sugars; [ST]: Concentration of starch; G: Girdling; D: Defoliation.

Table S2. F-value of two-way ANOVAs testing the effects of girdling (girdled and ungirdled) and harvesting time (4 h and 24 h) on the carbon isotopic composition ( $\delta^{13}\text{C}$ ) and  $^{13}\text{C}$  assimilation ( $^{13}\text{C}$ ) throughout branch tissues (needles, twigs and cones) in reproductive and vegetative branches of *Pinus koraiensis*, and on the amount of undetected label after  $^{13}\text{C}$  labelling-pulse applied to vegetative branches (Experiment 2).

|                        | Reproductive branch               |                                     |                                   |                             |                               |                             | Vegetative branch                 |                                     |                             |                               | Undetected<br>( $^{13}\text{C}$ ) |
|------------------------|-----------------------------------|-------------------------------------|-----------------------------------|-----------------------------|-------------------------------|-----------------------------|-----------------------------------|-------------------------------------|-----------------------------|-------------------------------|-----------------------------------|
|                        | Twig<br>( $\delta^{13}\text{C}$ ) | Needle<br>( $\delta^{13}\text{C}$ ) | Cone<br>( $\delta^{13}\text{C}$ ) | Twig<br>( $^{13}\text{C}$ ) | Needle<br>( $^{13}\text{C}$ ) | Cone<br>( $^{13}\text{C}$ ) | Twig<br>( $\delta^{13}\text{C}$ ) | Needle<br>( $\delta^{13}\text{C}$ ) | Twig<br>( $^{13}\text{C}$ ) | Needle<br>( $^{13}\text{C}$ ) |                                   |
| Girdling               | 58.32<br>**                       | 2100.84<br>**                       | 14.11<br>**                       | 64.73<br>**                 | 531.64<br>**                  | 36.56<br>**                 | 14.11<br>**                       | 52.62<br>**                         | 0.9<br>ns                   | 0.207<br>ns                   | 30.94<br>**                       |
| Time                   | 50.00<br>**                       | 2162.10<br>**                       | 35.26<br>**                       | 36.78<br>**                 | 578.76<br>**                  | 19.61<br>**                 | 1257.96<br>**                     | 459.76<br>**                        | 45.9<br>**                  | 288.24<br>**                  | 33.47<br>**                       |
| Girdling $\times$ Time | 40.94<br>**                       | 2094.11<br>**                       | 34.75<br>**                       | 34.31<br>**                 | 551.59<br>**                  | 22.69<br>**                 | 64.73<br>**                       | 44.72<br>**                         | 11.34<br>*                  | 13.44<br>*                    | 0.48<br>ns                        |

ns denote a non-significant effect; \* and \*\* indicate significant effects at 0.05 and 0.01 significance levels, respectively.
